# Supplementary material for: Processing Optimization and Characterization of Angiotensin-Ι-Converting Enzyme Inhibitory Peptides from Lizardfish (Synodus macrops) Scale Gelatin
Source: PubMed Central journal article supplement (PMC6071053; doi:10.3390/md16070228), 2018-07-04
Supplement: marinedrugs-16-00228-s001.pdf [file marinedrugs-16-00228-s001.pdf]

## Supplementary Materials

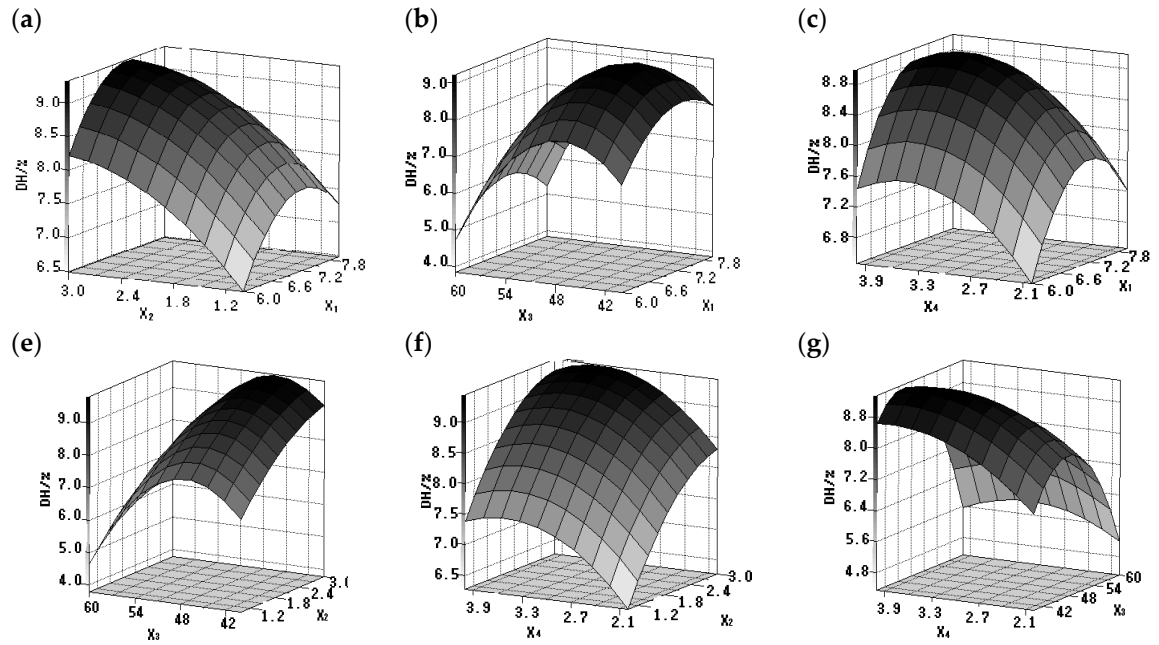

**Figure S1.** Response surfaces plots for the effects of variables on the diameter of the degree of hydrolysis : (a):  $X_1$  and  $X_2$ ; (b):  $X_1$  and  $X_3$ ; c:  $X_1$  and  $X_4$ ; d:  $X_2$  and  $X_3$ ; e:  $X_2$  and  $X_4$ ; f:  $X_3$  and  $X_4$ .

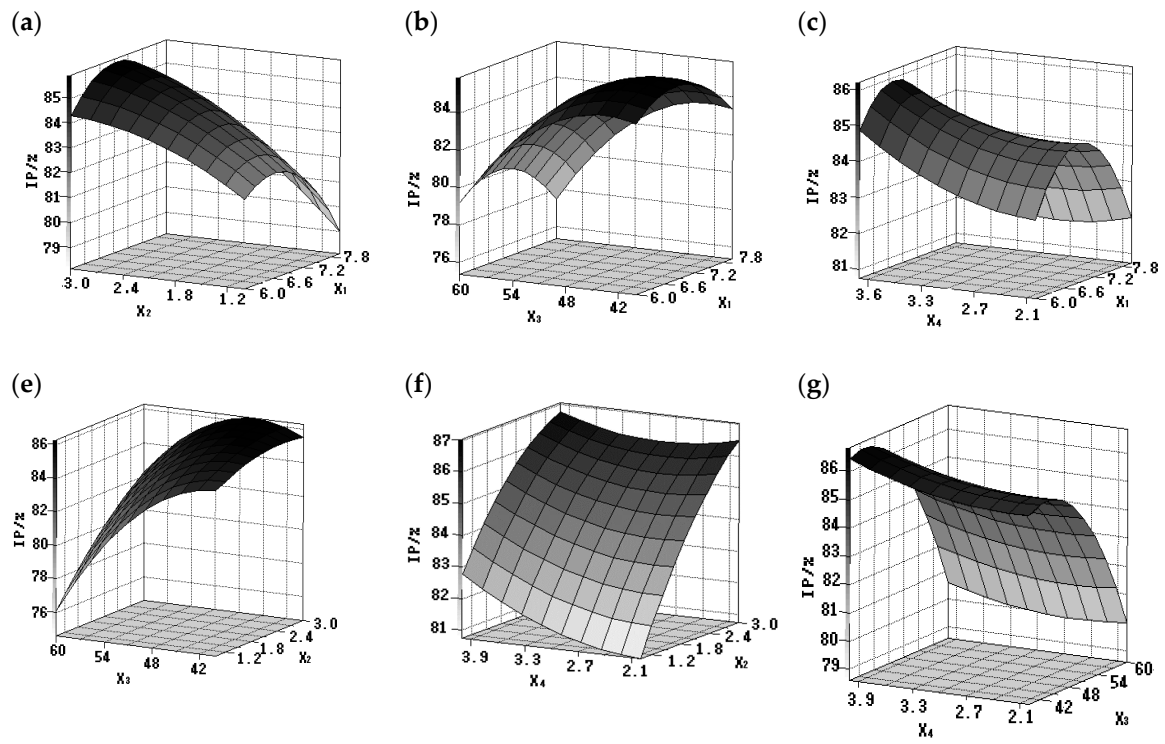

**Figure S2.** Response surfaces plots for the effects of variables on the diameter of the inhibition percentage (IP) : (a):  $X_1$  and  $X_2$ ; (b):  $X_1$  and  $X_3$ ; c:  $X_1$  and  $X_4$ ; d:  $X_2$  and  $X_3$ ; e:  $X_2$  and  $X_4$ ; f:  $X_3$  and  $X_4$ .

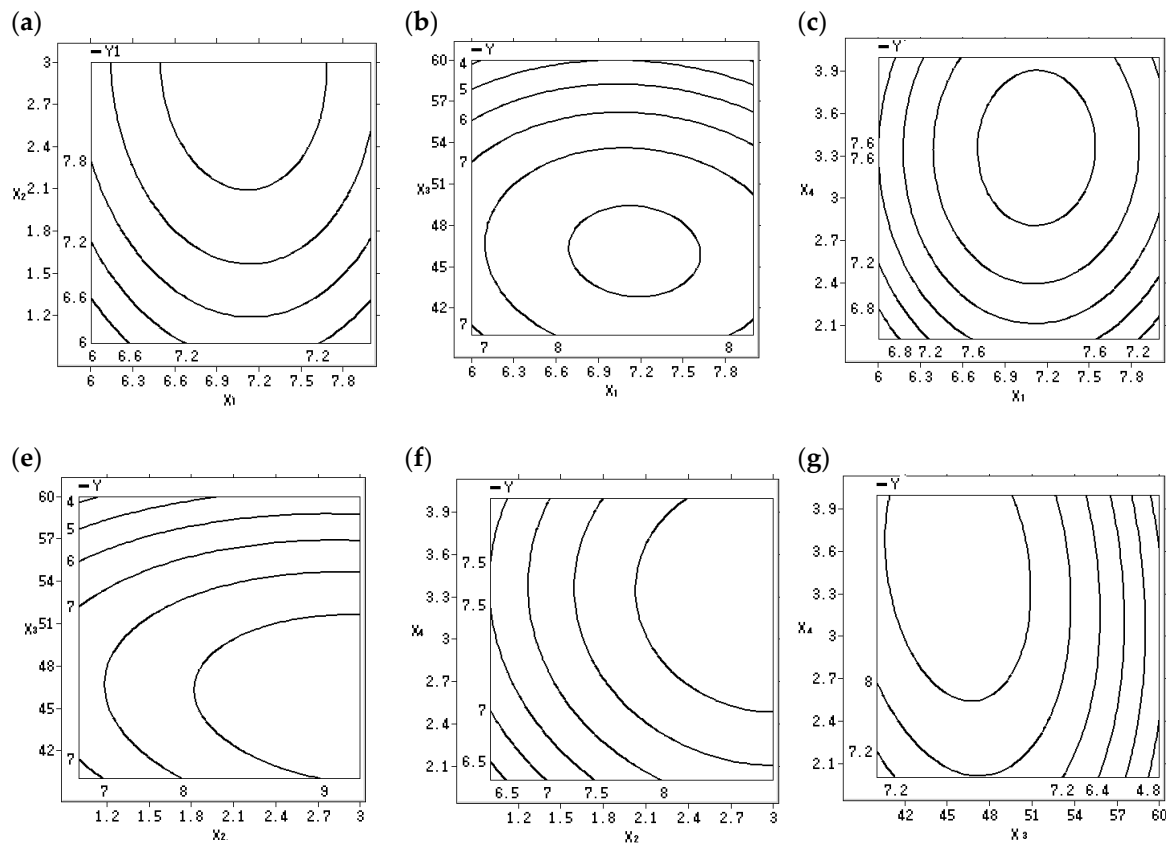

**Figure S3.** Contour plots for the effects of variables on the diameter of the degree of hydrolysis (DH) : (a): X<sub>1</sub> and X<sub>2</sub>; (b): X<sub>1</sub> and X<sub>3</sub>; c: X<sub>1</sub> and X<sub>4</sub>; d: X<sub>2</sub> and X<sub>3</sub>; e: X<sub>2</sub> and X<sub>4</sub>; f: X<sub>3</sub> and X<sub>4</sub>.

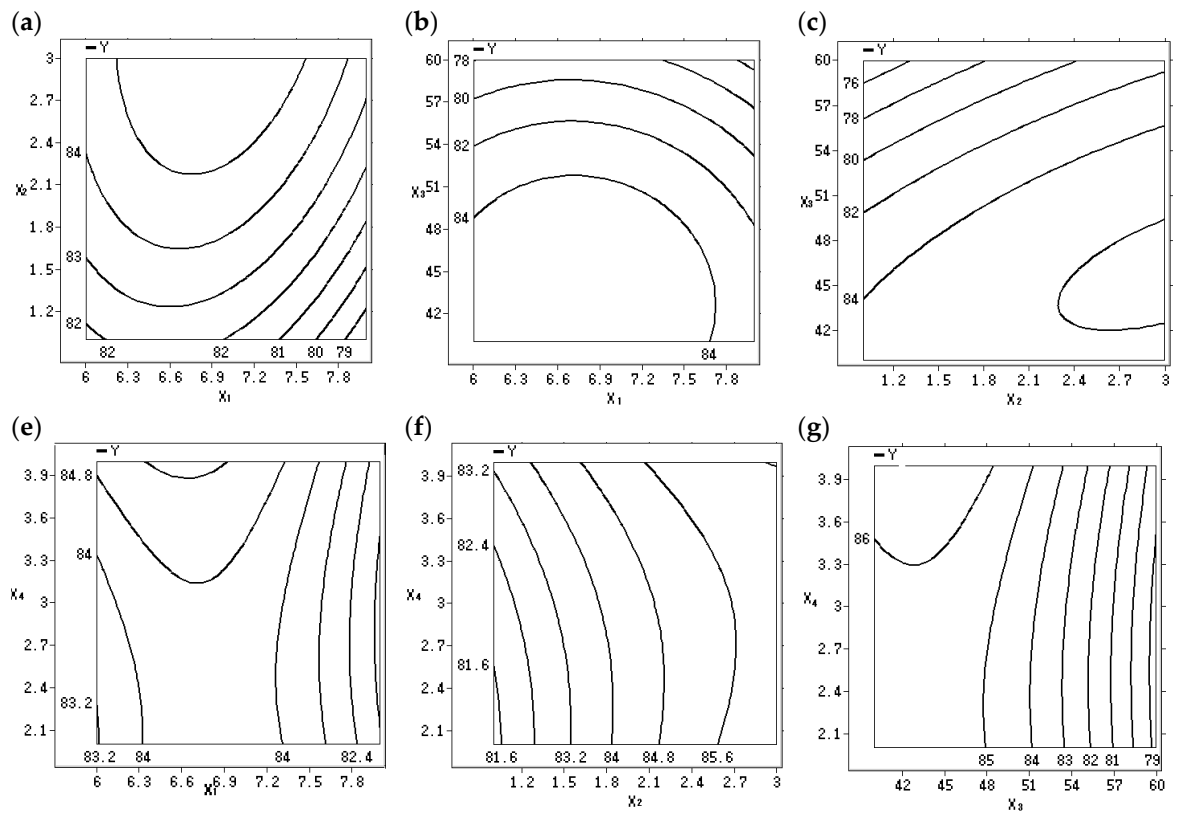

**Figure S4.** Response surfaces plots for the effects of variables on the diameter of the inhibition percentage (IP) : (a): X<sub>1</sub> and X<sub>2</sub>; (b): X<sub>1</sub> and X<sub>3</sub>; c: X<sub>1</sub> and X<sub>4</sub>; d: X<sub>2</sub> and X<sub>3</sub>; e: X<sub>2</sub> and X<sub>4</sub>; f: X<sub>3</sub> and X<sub>4</sub>.

19-Apr-2018  
12:31:12

Probe: ESI  
Conc: 50v  
Desovation Temp :350

Capillary:3.00KV  
Extractor: 5v  
Gas Flow : 350  
Scan ES+  
2.06e6

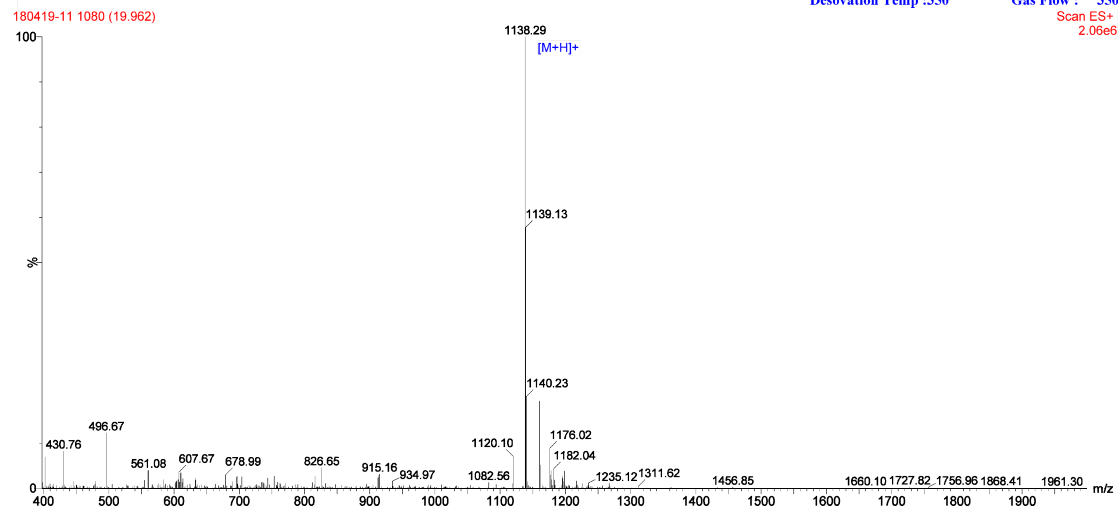

Figure S5. AGPPGSDGQPGAK,  $m/z$  1137.29 performed by Waters ZQ2000 mass spectrometry analysis.

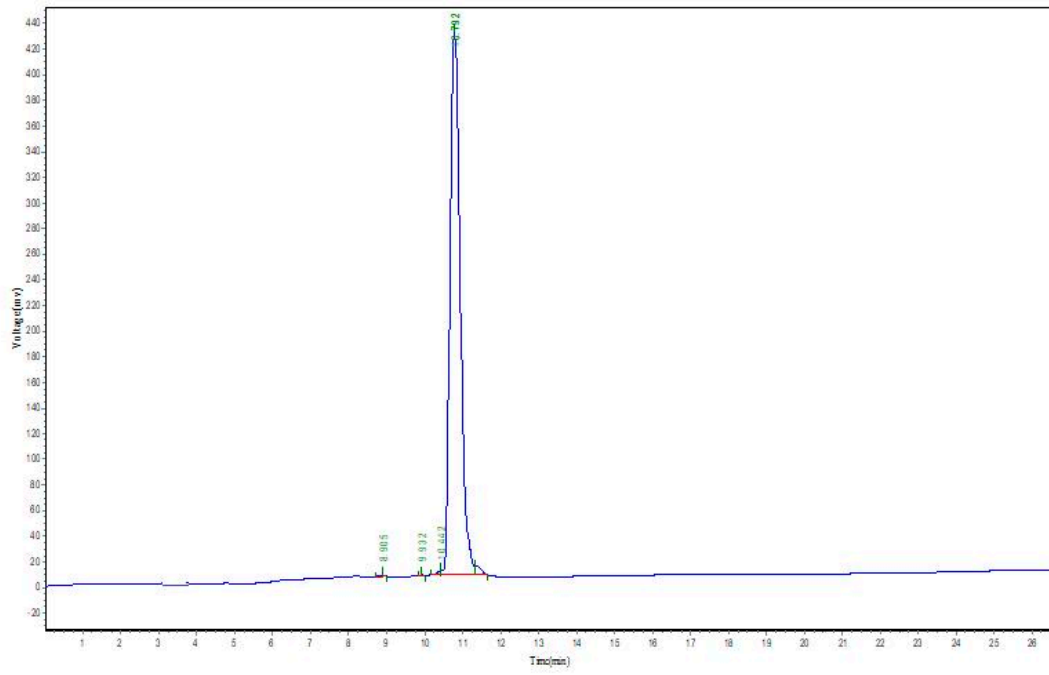

**Figure S6.** Chromatogram on a SinoChrom ODS-BP C18 column of the AGPPGSDGQPGAK .

**Table S1.** Peptides identified from lizardfish scales gelatin

| No. | Peptide                   | GRAVY  | Mass      |
|-----|---------------------------|--------|-----------|
| 1   | AGKDGMSGLPGPTGPPGPR       | -0.858 | 1763.8624 |
| 2   | AGLPGPSGEPGK              | -0.75  | 1123.5509 |
| 3   | AGLPGPSGEPGKQGAPGS        | -0.772 | 1620.7743 |
| 4   | AGPAGASGPAGPR             | -0.346 | 1064.5363 |
| 5   | AGPPGSDGQPGAK             | -1.115 | 1137.5414 |
| 6   | AVGETGKPGEQGLPGEA         | -0.718 | 1611.7739 |
| 7   | DDKSPAMPVPGPM             | -0.669 | 1340.6105 |
| 8   | DDKSPAMPVPGPMGPM          | -0.55  | 1625.7251 |
| 9   | DEKSGGMPIPGPM             | -0.723 | 1357.6006 |
| 10  | DEKSGGMPIPGPMGPM          | -0.594 | 1642.7153 |
| 11  | DEKSGGMPIPGPMGPMG         | -0.582 | 1699.7368 |
| 12  | DEKSGGMPIPGPMGPMGPR       | -0.842 | 1968.8855 |
| 13  | DEKSPAMPVPGPM             | -0.669 | 1354.6261 |
| 14  | DEKSPAMPVPGPMGPM          | -0.55  | 1639.7408 |
| 15  | DEKSPAMPVPGPMGPMG         | -0.541 | 1696.7622 |
| 16  | DEKSPAMPVPGPMGPMGPR       | -0.805 | 1965.911  |
| 17  | DEKSPAMPVPGPSGPM          | -0.719 | 1595.7323 |
| 18  | DGMNGIPGPIGPPGPR          | -0.662 | 1530.7612 |
| 19  | DGMNGIPGPIGPPGPRG         | -0.647 | 1603.7776 |
| 20  | DGMNGLPGPIGPPGPR          | -0.706 | 1530.7612 |
| 21  | DGMNGLPGPIGPPGPRG         | -0.688 | 1603.7776 |
| 22  | DGMSGLPGPTGPPGPR          | -0.863 | 1491.714  |
| 23  | DGMSGLPGPTGPPGPRG         | -0.835 | 1564.7303 |
| 24  | DGVSLPGPTGPPGPR           | -0.719 | 1489.7524 |
| 25  | DHSKSSGPPVPGPM            | -1.007 | 1503.6064 |
| 26  | DHSKSSGPPVPGPMGPM         | -0.835 | 1788.7212 |
| 27  | DKSPAMPVPGPM              | -0.433 | 1225.5835 |
| 28  | DKSPAMPVPGPMGPM           | -0.353 | 1510.6982 |
| 29  | EKSGGMPIPGPMGPM           | -0.4   | 1527.6884 |
| 30  | EKSPAMPVPGPM              | -0.433 | 1239.5991 |
| 31  | EKSPAMPVPGPMGPM           | -0.353 | 1524.7139 |
| 32  | FAGPPGADGQAGAR            | -0.45  | 1300.616  |
| 33  | FTGPPGEPGEAGASGPMGPR      | -0.755 | 1883.8472 |
| 34  | GASGPAGPRGPAGSA           | -0.38  | 1208.5897 |
| 35  | GDRGESGPAGASGAPPPGAPGPVGA | -0.544 | 2239.0618 |
| 36  | GEPGLIGPPGPPGAGDI         | -0.244 | 1612.8096 |
| 37  | GEQGPAGPSGAPGPR           | -1.14  | 1333.6375 |
| 38  | GEQGPAGSAGPAGPR           | -0.913 | 1307.6218 |
| 39  | GERGPPGLPGPPGL            | -0.743 | 1299.6935 |
| 40  | GESGAPGVQPPGPAGEEGK       | -1.005 | 1792.8226 |
| 41  | GETGAAGENGTGAMGPR         | -0.817 | 1658.7318 |

|    |                              |        |           |
|----|------------------------------|--------|-----------|
| 42 | GFAGLPGSPGEPGKQGAPGS         | -0.575 | 1824.8641 |
| 43 | GFDEKSGMPIPMPMGPM            | -0.394 | 1846.8052 |
| 44 | GGLGPQGGPGEDGERG             | -1.319 | 1438.6437 |
| 45 | GGPGEPGSPGSPGPRG             | -1.275 | 1377.6272 |
| 46 | GGPGPQGPSGSPGPR              | -1.333 | 1319.6218 |
| 47 | GGPGPQGPSGSPGPRG             | -1.275 | 1376.6432 |
| 48 | GGPRGPPGDAGRA                | -1.208 | 1179.5745 |
| 49 | GIQGPVGLPGPAGPI              | 0.46   | 1344.7401 |
| 50 | GKDGMSGLPGPTGPPGP            | -0.8   | 1536.7242 |
| 51 | GKDGMSGLPGPTGPPGPR           | -1.006 | 1676.8303 |
| 52 | GKDGMSGLPGPTGPPGPRG          | -0.974 | 1749.8468 |
| 53 | GKDGMSGMPGPIGPLGPR           | -0.522 | 1722.8545 |
| 54 | GLTGPIGLPGPAGAT              | 0.5    | 1293.6929 |
| 55 | GMPGPAGPPGPTGANGDKGESGS      | -0.974 | 2025.8698 |
| 56 | GMPGPAGPPGPTGANGDKGESGSFGPA  | -0.733 | 2398.0496 |
| 57 | GMSGLPGPTGPPGPR              | -0.687 | 1392.6819 |
| 58 | GMSGLPGPTGPPGPRG             | -0.669 | 1449.7034 |
| 59 | GMTGSPGSPGPDGK               | -1.043 | 1259.5452 |
| 60 | GNVGPAGPAGPLG                | 0.1    | 1062.5458 |
| 61 | GPAGSAGSAGKDGMSGLPGPTGPPGPR  | -0.633 | 2390.1284 |
| 62 | GPAGSAGSPGKDGMSGLPGPTGPPGPR  | -0.759 | 2374.1335 |
| 63 | GPAGSSGSPGKDG MNGLPGPIGPPGPR | -0.763 | 2429.1758 |
| 64 | GPGGERGPNMGPMG               | -1.292 | 1197.5197 |
| 65 | GPRGPPGPPGSSGPQG             | -1.35  | 1400.6796 |
| 66 | GPSGNIGLPGMTGPQGEAGRE        | -0.743 | 1997.9113 |
| 67 | GPSGPAGPPGARGD               | -0.971 | 1207.5581 |
| 68 | GPTGPVGA PGKDG DVGAQ         | -0.572 | 1594.7587 |
| 69 | GRTGPIGMPGARG                | -0.515 | 1241.6299 |
| 70 | GSAGPGGERGPPGPMGPPGL         | -0.705 | 1743.8362 |
| 71 | GSPGKDG MN GEPGPIGPPGPDG     | -1.141 | 1988.8898 |
| 72 | GSPGKDG MN GIPGPIGPPGPR      | -0.843 | 1972.9789 |
| 73 | GSPGKDG MN GLPGPIGPPGPR      | -0.876 | 1972.9789 |
| 74 | IAVPGPMGPMG                  | 0.755  | 1025.5038 |
| 75 | IGFPGPKGPAGE                 | -0.392 | 1141.5767 |
| 76 | IGLPGMTGPQ                   | 0.16   | 985.4902  |
| 77 | IGLPGMTGPQGEA                | -0.038 | 1242.5914 |
| 78 | IGLPGMTGPQGEAGR              | -0.36  | 1456.698  |
| 79 | IGLPGMTGPQGEAGRE             | -0.556 | 1585.7406 |
| 80 | IGMPGMTGPQ                   | -0.03  | 1003.4467 |
| 81 | IGMPGMTGPQGEAGRE             | -0.675 | 1602.713  |
| 82 | KGDNGISGPTGPLGPIGPPGL        | -0.314 | 1921.9873 |
| 83 | KSGGMPIPMPMGPM               | -0.179 | 1412.6614 |
| 84 | LGAPGKDG DVGAPGAPGPAGPSGE    | -0.467 | 2061.9602 |
| 85 | LGEPGRVGA                    | -0.26  | 967.5087  |



|     |                         |        |           |
|-----|-------------------------|--------|-----------|
| 86  | LTGPIGLPGPAGAT          | 0.564  | 1236.6714 |
| 87  | LTGPIGLPGPAGATGD        | 0.25   | 1408.7197 |
| 88  | MGFPGPKGPGGD            | -0.792 | 1131.5018 |
| 89  | MGPTGPVGPAGKD           | -0.508 | 1198.5652 |
| 90  | MGPTGPVGPAGKGDVGAQ      | -0.442 | 1725.7992 |
| 91  | MKAPMSAFSAV             | 0.827  | 1138.5515 |
| 92  | MPVPGPMGPM              | 0.27   | 1012.4544 |
| 93  | MTGSPGSPGPDGK           | -1.092 | 1202.5237 |
| 94  | PAMPVPGPMGPMG           | 0.192  | 1251.5814 |
| 95  | PAMPVPGPMGPMGPR         | -0.24  | 1490.7196 |
| 96  | PGADGAAGGK              | -0.52  | 815.3773  |
| 97  | PGLAGPVGEPGKQGSPGPS     | -0.689 | 1683.8579 |
| 98  | PGLPGPSGEPGKQGAPGS      | -0.961 | 1604.7794 |
| 99  | PIGLPGPAGAT             | 0.473  | 965.5181  |
| 100 | PIGLPGPAGATGD           | 0.1    | 1137.5665 |
| 101 | PKGELGPIGLPMPGPPGE      | -0.653 | 1838.9413 |
| 102 | QGGAGPSGERGPPGPMGPPGL   | -0.838 | 1871.8948 |
| 103 | QGPGGPGGERGPPGPM        | -1.275 | 1462.6622 |
| 104 | QGSPGPGGERGPPGPMGPPG    | -1.24  | 1800.8213 |
| 105 | QGSPGPGGERGPPGPMGPPGL   | -1     | 1913.9053 |
| 106 | RGADGNVGPAGPAGPLG       | -0.312 | 1461.7324 |
| 107 | RGSPGPDGNNGPAGPVG       | -1.094 | 1504.7018 |
| 108 | SGGMPIPGPMGPM           | 0.108  | 1284.5665 |
| 109 | SGLDGAKGDSGPAGPK        | -0.887 | 1412.6895 |
| 110 | SPAMPVPGPMGPM           | 0.162  | 1267.5763 |
| 111 | SPAMPVPGPMGPMGPR        | -0.275 | 1593.7466 |
| 112 | TGPPGEPGEAGASGPMGPR     | -0.942 | 1736.7787 |
| 113 | VGAPGPSGPAGPA           | 0.062  | 1049.5142 |
| 114 | VGAPGPSGPAGPAGEK        | -0.438 | 1363.6731 |
| 115 | VGERGPPGPMGPPGL         | -0.54  | 1416.7183 |
| 116 | VGERGPPGPMGPPGLSGAPGEAG | -0.504 | 2074.9741 |
| 117 | VMGPTGPVGPAGKGDVGAQ     | -0.21  | 1824.8676 |
| 118 | YDDKSPAMPVPGPMGPM       | -0.594 | 1788.7885 |

\*The grand average of hydropathicity (GRAVY) index value was used to evaluate the hydrophilic and hydrophobic character of the identified peptides
